# Supplementary material for: Simultaneous nitrogen and phosphorus removal from domestic wastewater in an aerobic granulation system operated at different anaerobic–aerobic durations
Source: Royal Society of Chemistry journal article supplement (doi:10.1039/d2ew00224h), 2022-01-01
Supplement: d2ew00224h1.pdf [file d2ew00224h1.pdf]

## Simultaneous nitrogen and phosphorus removal from domestic wastewater in an aerobic granulation system operated at different anaerobic-aerobic duration

### Calculations for nitrogen assimilated

The percentage of nitrogen assimilated by the biomass was calculated based on the following equation as described by Wan *et al.* (2009):

$$N_{\text{assimilation}} (\text{g}_N \text{ d}^{-1}) = f_N (\Delta X_V + \text{VSS}_{\text{out}} Q_{\text{out}}) \quad (1)$$

$$\eta_{\text{assimilation}} (\%) = (N_{\text{assimilation}} / \text{NH}_4^+ - \text{N}_{\text{in}}) \times 100 \quad (2)$$

where:

$f_N$  = nitrogen fraction of the sludge ( $\text{mg}_N \cdot \text{mg}^{-1} \text{VSS}$ )

\*The value was assumed to be equal to  $0.1 \text{ mg}_N \cdot \text{mg}^{-1} \text{VSS}$  as suggested by Lee *et al.* (2007) and Wan *et al.* (2009)

$\Delta X_V$  = slope between two measurements of sludge concentration inside the SBR over time ( $\text{g}_{\text{vss}} \text{ d}^{-1}$ )

$\text{VSS}_{\text{out}}$  = solid concentration present in the effluent ( $\text{g}_{\text{vss}} \text{ L}^{-1}$ )

$Q_{\text{out}}$  = flow rate of effluent ( $\text{L d}^{-1}$ )

$\eta_{\text{assimilation}}$  = assimilation efficiency (%)

$\text{NH}_4^+ - \text{N}_{\text{in}}$  = concentration of  $\text{NH}_4^+ - \text{N}$  in influent

Table S1: Raw data for nitrogen assimilation calculations for (a) M1; (b) M2 and (c) M3

(a)

| Day | $\Delta XV$ | $VSS_{out}$ | $Q_{out}$ | $N_{assimilation}$ | $NH_4^+-N_{in}$ | $\eta_{assimilation}$ |
|-----|-------------|-------------|-----------|--------------------|-----------------|-----------------------|
| 349 | 2.16        | 0.023       | 16.4      | 0.25               | 26.1            | 0.96                  |
| 350 | 2.02        | 0.034       | 16.4      | 0.26               | 19.7            | 1.32                  |
| 351 | 2.88        | 0.025       | 16.4      | 0.33               | 20.3            | 1.63                  |
| 355 | 1.77        | 0.032       | 16.4      | 0.23               | 16              | 1.44                  |
| 356 | 1.75        | 0.020       | 16.4      | 0.21               | 10              | 2.10                  |

(b)

| Day | $\Delta XV$ | $VSS_{out}$ | $Q_{out}$ | $N_{assimilation}$ | $NH_4^+-N_{in}$ | $\eta_{assimilation}$ |
|-----|-------------|-------------|-----------|--------------------|-----------------|-----------------------|
| 393 | 2.98        | 0.045       | 16.4      | 0.37               | 20.8            | 1.78                  |
| 394 | 3.04        | 0.039       | 16.4      | 0.37               | 20.8            | 1.78                  |
| 398 | 3.11        | 0.048       | 16.4      | 0.39               | 23.5            | 1.66                  |
| 399 | 2.99        | 0.050       | 16.4      | 0.38               | 19.8            | 1.92                  |
| 400 | 3.25        | 0.046       | 16.4      | 0.40               | 20.5            | 1.95                  |

(c)

| Day | $\Delta XV$ | $VSS_{out}$ | $Q_{out}$ | $N_{assimilation}$ | $NH_4^+-N_{in}$ | $\eta_{assimilation}$ |
|-----|-------------|-------------|-----------|--------------------|-----------------|-----------------------|
| 349 | 2.33        | 0.032       | 16.4      | 0.29               | 25.3            | 1.15                  |
| 350 | 2.56        | 0.037       | 16.4      | 0.32               | 23.3            | 1.37                  |
| 351 | 2.79        | 0.035       | 16.4      | 0.34               | 29.8            | 1.14                  |
| 355 | 2.44        | 0.040       | 16.4      | 0.31               | 23.5            | 1.32                  |
| 356 | 2.49        | 0.037       | 16.4      | 0.31               | 22.8            | 1.36                  |

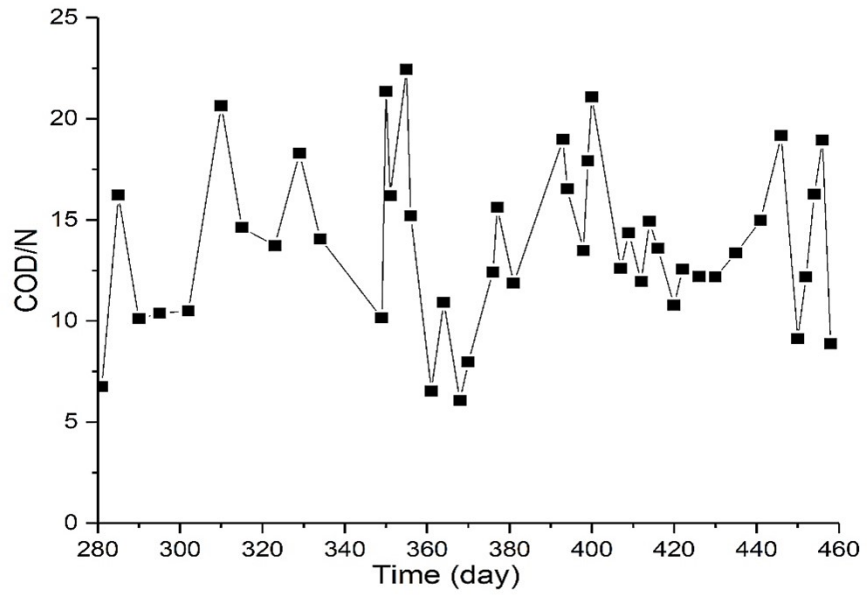

Figure S1: Profile of COD/N in the influent feed during M1, M2 and M3

Table S2: Raw data for SND calculations for (a) M1; (b) M2 and (c) M3

(a)

| Day | NH <sub>4</sub> <sup>+</sup> -N start-aerobic * | NH <sub>4</sub> <sup>+</sup> -N end-nitrification * | NO <sub>2</sub> <sup>-</sup> -N influent * | NO <sub>2</sub> <sup>-</sup> -N end-nitrification * | NO <sub>3</sub> <sup>-</sup> -N influent * | NO <sub>3</sub> <sup>-</sup> -N end-nitrification * | NH <sub>4</sub> <sup>+</sup> -N removed * | NO <sub>x</sub> <sup>-</sup> -N accumulated * | NO <sub>x</sub> <sup>-</sup> -N denitrified * | SND (%) |
|-----|-------------------------------------------------|-----------------------------------------------------|--------------------------------------------|-----------------------------------------------------|--------------------------------------------|-----------------------------------------------------|-------------------------------------------|-----------------------------------------------|-----------------------------------------------|---------|
| 349 | 24.8                                            | 6.2                                                 | 3                                          | 9                                                   | 3                                          | 6.2                                                 | 18.6                                      | 9.2                                           | 9.4                                           | 50.5    |
| 350 | 17.8                                            | 6.7                                                 | 2                                          | 6                                                   | 0                                          | 0.4                                                 | 11.1                                      | 4.4                                           | 6.7                                           | 60.4    |
| 351 | 16                                              | 6.8                                                 | 5                                          | 9                                                   | 4                                          | 4                                                   | 9.2                                       | 4.0                                           | 5.2                                           | 56.5    |
| 355 | 15.3                                            | 4.3                                                 | 3                                          | 7                                                   | 3                                          | 4.8                                                 | 11.0                                      | 5.8                                           | 5.2                                           | 47.3    |
| 356 | 8.5                                             | 2.9                                                 | 3                                          | 1                                                   | 2                                          | 6.6                                                 | 5.6                                       | 2.6                                           | 3.0                                           | 53.6    |

(b)

| Day | NH <sub>4</sub> <sup>+</sup> -N start-aerobic * | NH <sub>4</sub> <sup>+</sup> -N end-nitrification * | NO <sub>2</sub> <sup>-</sup> -N influent * | NO <sub>2</sub> <sup>-</sup> -N end-nitrification * | NO <sub>3</sub> <sup>-</sup> -N influent * | NO <sub>3</sub> <sup>-</sup> -N end-nitrification * | NH <sub>4</sub> <sup>+</sup> -N removed * | NO <sub>x</sub> <sup>-</sup> -N accumulated * | NO <sub>x</sub> <sup>-</sup> -N denitrified * | SND (%) |
|-----|-------------------------------------------------|-----------------------------------------------------|--------------------------------------------|-----------------------------------------------------|--------------------------------------------|-----------------------------------------------------|-------------------------------------------|-----------------------------------------------|-----------------------------------------------|---------|
| 393 | 21.3                                            | 17.5                                                | 3                                          | 8                                                   | 3                                          | 0.8                                                 | 3.8                                       | 2.8                                           | 1.0                                           | 26.3    |
| 394 | 21.8                                            | 16.3                                                | 4                                          | 10                                                  | 2                                          | 0.1                                                 | 5.5                                       | 4.1                                           | 1.4                                           | 25.5    |
| 398 | 24.4                                            | 19.3                                                | 0                                          | 3                                                   | 0                                          | 0.8                                                 | 5.1                                       | 3.8                                           | 1.3                                           | 25.5    |
| 399 | 21.5                                            | 15.8                                                | 2                                          | 6                                                   | 0                                          | 0.2                                                 | 5.7                                       | 4.2                                           | 1.5                                           | 26.3    |
| 400 | 23.2                                            | 16.5                                                | 4                                          | 11                                                  | 3                                          | 0.9                                                 | 6.7                                       | 4.9                                           | 1.8                                           | 26.9    |

(c)

| Day | NH <sub>4</sub> <sup>+</sup> -N start-aerobic * | NH <sub>4</sub> <sup>+</sup> -N end-nitrification * | NO <sub>2</sub> <sup>-</sup> -N influent * | NO <sub>2</sub> <sup>-</sup> -N end-nitrification * | NO <sub>3</sub> <sup>-</sup> -N influent * | NO <sub>3</sub> <sup>-</sup> -N end-nitrification * | NH <sub>4</sub> <sup>+</sup> -N removed * | NO <sub>x</sub> <sup>-</sup> -N accumulated * | NO <sub>x</sub> <sup>-</sup> -N denitrified * | SND (%) |
|-----|-------------------------------------------------|-----------------------------------------------------|--------------------------------------------|-----------------------------------------------------|--------------------------------------------|-----------------------------------------------------|-------------------------------------------|-----------------------------------------------|-----------------------------------------------|---------|
| 450 | 24.1                                            | 8.8                                                 | 2                                          | 7                                                   | 1                                          | 5.7                                                 | 15.3                                      | 9.7                                           | 5.6                                           | 36.6    |
| 452 | 22.4                                            | 7.8                                                 | 4                                          | 12                                                  | 3                                          | 5.0                                                 | 14.6                                      | 10.0                                          | 4.6                                           | 31.5    |
| 454 | 28.2                                            | 8.0                                                 | 5                                          | 14                                                  | 6                                          | 13.9                                                | 20.2                                      | 16.9                                          | 3.3                                           | 16.3    |
| 456 | 21.9                                            | 6.3                                                 | 3                                          | 9                                                   | 3                                          | 7.7                                                 | 15.6                                      | 10.7                                          | 4.9                                           | 31.4    |
| 458 | 19.7                                            | 4.3                                                 | 4                                          | 11                                                  | 4                                          | 5.9                                                 | 15.4                                      | 8.9                                           | 6.5                                           | 42.2    |

\* Unit mg/L

### Calculations for free nitrous acid (FNA) production

The FNA concentration was calculated using the equation as described by Anthonisen *et al.* (1976).

$$\text{FNA concentration } (\mu\text{g/L}) = [\text{NO}_2^-\text{-N concentration} / 10^{\text{pH}} \times \exp(-2300 / (273 + T))] \times 1000$$

where:

$\text{NO}_2^-$ -N concentration = Nitrite nitrogen concentration in the SBR at the end of aerobic(mg/L)

pH = pH of the bulk solution in SBR

\*The value was assumed to be equalled to 7.6 for M1, 6.2 for M2 and 7.3 for M3, based on the average value as presented in Table 1

T = Temperature (°C)

\*The value was assumed to be equalled to 25 as the experiment was conducted at room temperature

Table S3: Raw data for FNA concentration calculations for (a) M1; (b) M2 and (c) M3

(a)

| Day | NO <sub>2</sub> <sup>-</sup> -N (mg/L) | FNA concentration (μg/L) |
|-----|----------------------------------------|--------------------------|
| 349 | 9                                      | 0.51                     |
| 350 | 6                                      | 0.34                     |
| 351 | 9                                      | 0.51                     |
| 355 | 7                                      | 0.40                     |
| 356 | 1                                      | 0.05                     |

(b)

| <b>Day</b> | <b>NO<sub>2</sub><sup>-</sup>-N (mg/L)</b> | <b>FNA concentration (µg/L)</b> |
|------------|--------------------------------------------|---------------------------------|
| 393        | 8                                          | 11.35                           |
| 394        | 10                                         | 14.19                           |
| 398        | 3                                          | 4.28                            |
| 399        | 6                                          | 8.51                            |
| 400        | 11                                         | 15.61                           |

(c)

| <b>Day</b> | <b>NO<sub>2</sub><sup>-</sup>-N (mg/L)</b> | <b>FNA concentration (µg/L)</b> |
|------------|--------------------------------------------|---------------------------------|
| 450        | 7                                          | 0.79                            |
| 452        | 12                                         | 1.35                            |
| 454        | 14                                         | 1.58                            |
| 456        | 9                                          | 1.01                            |
| 458        | 11                                         | 1.24                            |

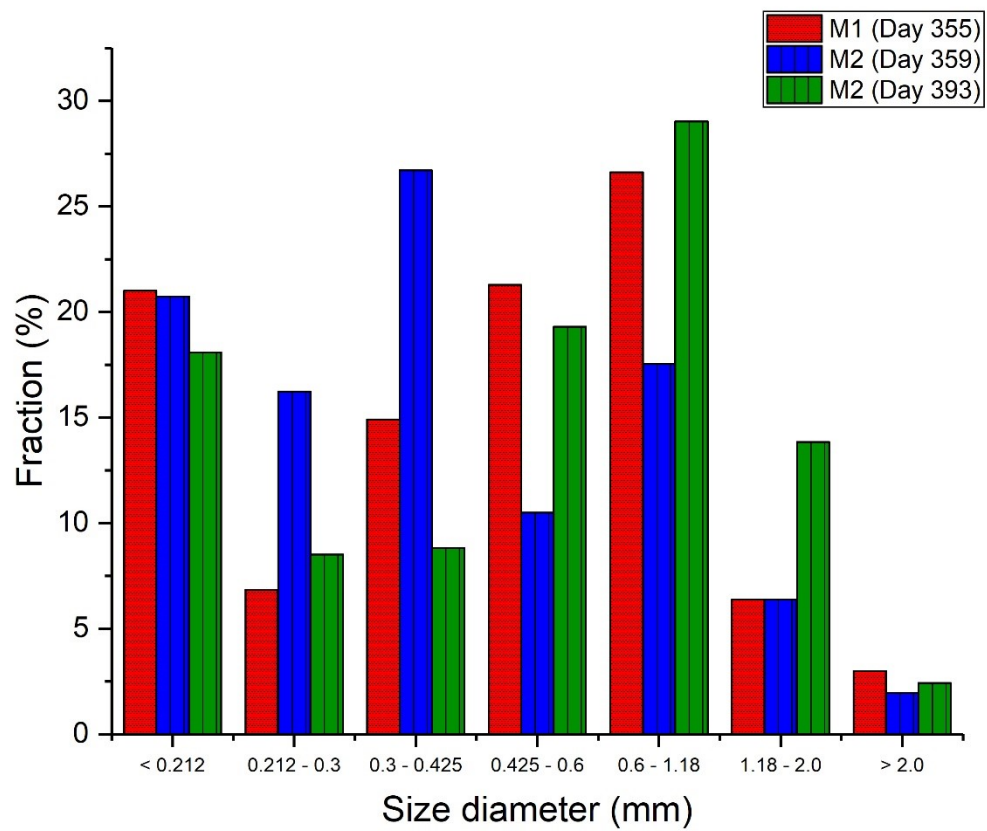

Figure S2: Size distribution formed during M1 (Day 355) and M2 (Day 359 and Day 393)

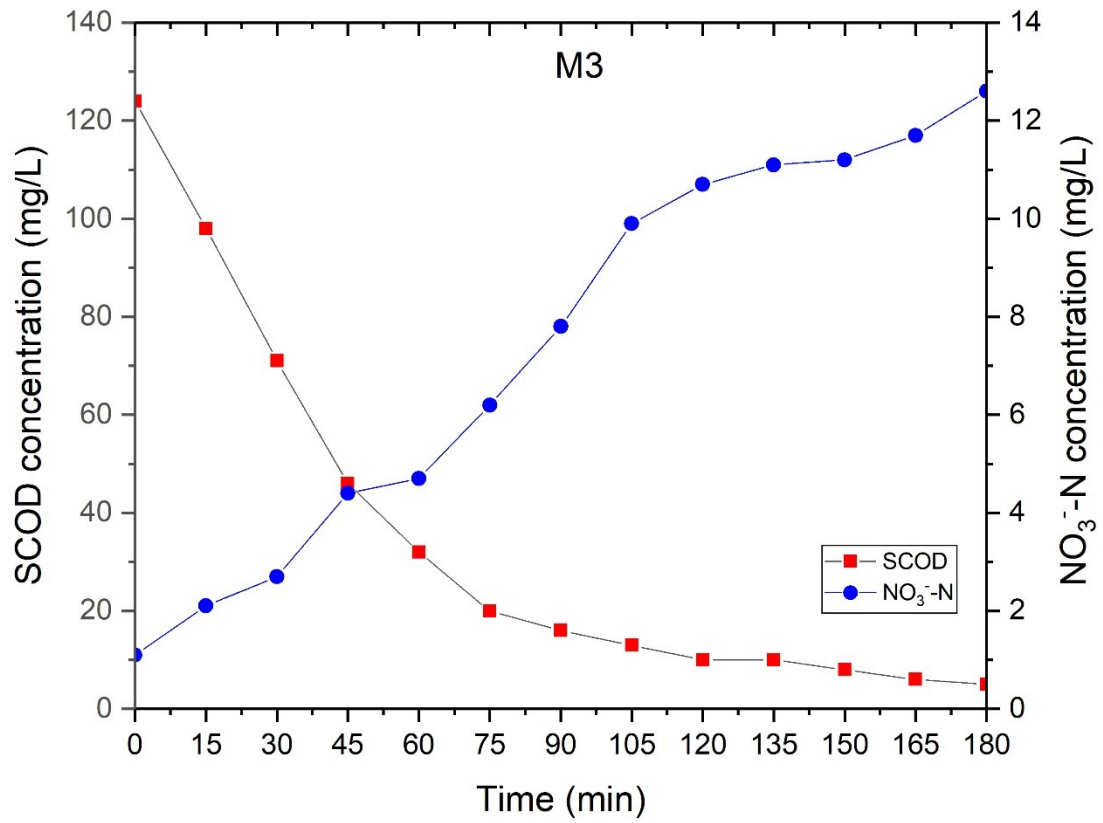

Figure S3: Cycle profile for SCOD and NO<sub>3</sub><sup>-</sup>-N concentration during M3 on Day 454



(a)

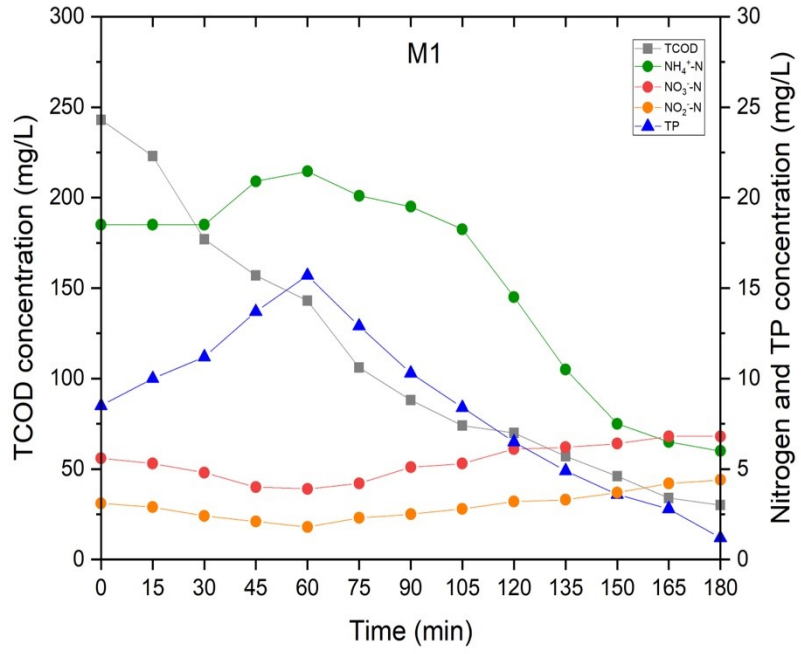

(b)

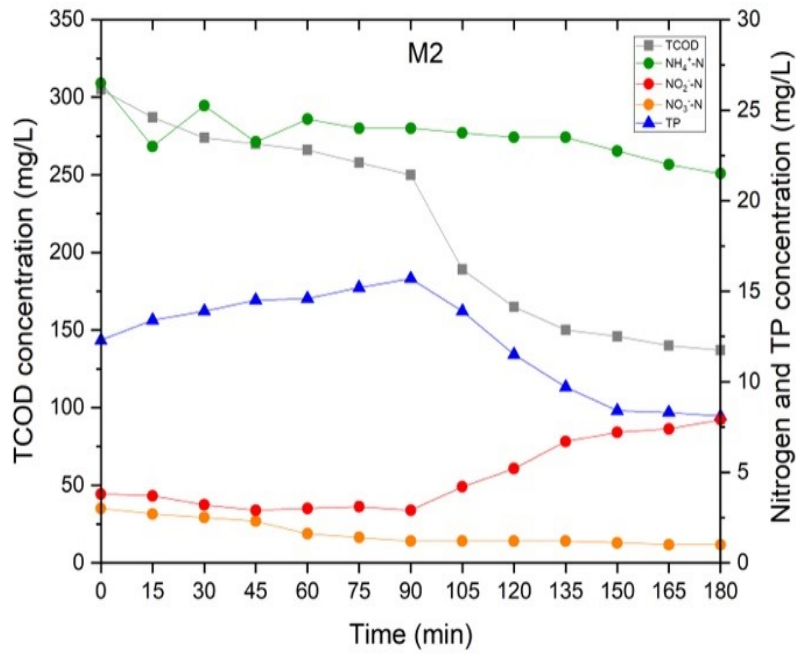

(c)

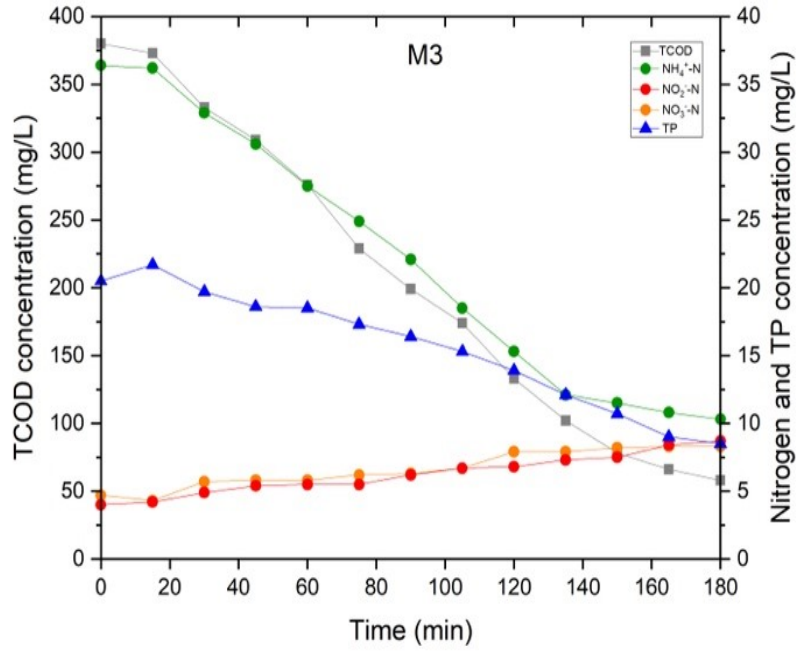

Figure S4: Cycle profile for TCOD, nitrogen and TP concentration during (a) M1 (Day 353), (b) M2 (Day 396) and (c) M3 (Day 455)

## **References**

- A. C. Anthonisen, R. C. Loehr, T. B. S. Prakasam and E. G. Srinath, Inhibition of nitrification by ammonia and nitrous acid, *J. Water Pollut. Control Fed.*, 1976, **48**, 835-852.
- J. K. Lee, K. H. Lee and S. B. Yim, Optimization of nitrogen removal in a sequencing batch reactor system by variation of the time distribution, *J. Environ. Sci Health, Part A, Toxic/Hazardous Substances and Environmental Engineering*, 2007, **42**(11), 1655-1663.
- J. Wan, Y. Bessière and M. Spérandio, Alternating anoxic feast, aerobic famine condition for improving granular sludge formation in sequencing batch airlift reactor at reduced aeration rate, *Water Research*, 2009, **43**(20), 5097-5108.
